# Supplementary material
Source: publisher figshare collection journal article supplement (https://acs.figshare.com/ndownloader/files/4741729)
Supplement: Supplementary file 1 [file 4741729]

data_General 
_audit_creation_date                  'Thu Apr 24 11:20:17 2003'
_audit_creation_method                'by teXsan'
_audit_update_record                   ?
#------------------------------------------------------------------------------
# PROCESSING SUMMARY (IUCr Office Use Only) 
_journal_date_recd_electronic          ?
_journal_date_from_coeditor            ?
_journal_date_accepted                 ?
_journal_coeditor_code                 ?
#------------------------------------------------------------------------------
# SUBMISSION DETAILS 
_publ_contact_author_name             ' ENTER NAME'
_publ_contact_author_address
;
    ENTER ADDRESS
;
_publ_contact_author_email            ' ENTER EMAIL ADDRESS '
_publ_contact_author_fax              ' ENTER FAX NUMBER '
_publ_contact_author_phone            ' ENTER PHONE NUMBER '
_publ_contact_letter
;
    ENTER TEXT OF LETTER
;
_publ_requested_journal               ' ENTER JOURNAL NAME HERE'
_publ_requested_category              ' CHOOSE FI FM FO CI CM CO or AD'

_publ_requested_coeditor_name          ?
#------------------------------------------------------------------------------
# TITLE AND AUTHOR LIST 

_publ_section_title
;
    ENTER SECTION TITLE
;

_publ_section_title_footnote
;
    ENTER FOOTNOTE TO TITLE OF PAPER
;
loop_
_publ_author_name
_publ_author_footnote
_publ_author_address
' FIRST AUTHORS NAME '
;
  FIRST AUTHORS FOOTNOTES
;
;
  FIRST AUTHORS ADDRESS
;
_publ_section_synopsis
;
  ENTER SYNOPSIS
;
#------------------------------------------------------------------------------
# TEXT 

_publ_section_abstract
;
    ENTER ABSTRACT
;

_publ_section_comment
;
    ENTER TEXT
;

_publ_section_acknowledgements
;
    ENTER ACKNOWLEDGEMENTS
;

_publ_section_references
;
    ENTER OTHER REFERENCES
Molecular Structure Corporation, Rigaku Corporation. (2000). teXsan. 
Single Crystal Structure Analysis Software. Version 1.11.
MSC, 3200 Research Forest Drive, The Woodlands, TX 77381, USA.
Rigaku, 3-9-12 Akishima, Tokyo, Japan.
;

_publ_section_figure_captions
;
    ENTER FIGURE CAPTIONS
;

_publ_section_exptl_prep
;
    ENTER COMPOUND PREPARATION DETAILS
;

_publ_section_exptl_refinement
;
    ENTER SPECIAL DETAILS OF THE REFINEMENT
;
#------------------------------------------------------------------------------
data_shiga008r
#------------------------------------------------------------------------------
# CHEMICAL DATA 
_chemical_formula_sum                  'C30 H38 Co2 Gd N5 O21 '
_chemical_formula_moiety               'C30 H38 Co2 Gd N5 O21 '
_chemical_formula_weight               1079.77
_chemical_melting_point                ?
#------------------------------------------------------------------------------
# CRYSTAL DATA 
_symmetry_cell_setting                 monoclinic
_symmetry_space_group_name_H-M        'C 1 2/c 1'
_symmetry_Int_Tables_number            15
loop_
_symmetry_equiv_pos_as_xyz
x,y,z
-x,y,1/2-z
-x,-y,-z
x,-y,1/2+z
1/2+x,1/2+y,z
1/2-x,1/2+y,1/2-z
1/2-x,1/2-y,-z
1/2+x,1/2-y,1/2+z
_cell_length_a                         14.0129(5)
_cell_length_b                         17.3636(4)
_cell_length_c                         16.3130(7)
_cell_angle_alpha                      90
_cell_angle_beta                       99.274(1)
_cell_angle_gamma                      90
_cell_volume                           3917.3(2)
_cell_formula_units_Z                  4
_cell_measurement_reflns_used          27665
_cell_measurement_theta_min            2.1
_cell_measurement_theta_max            27.5
_cell_measurement_temperature          296.2
#------------------------------------------------------------------------------
_exptl_crystal_description            'prism'
_exptl_crystal_colour                 'red'
_exptl_crystal_size_max                0.620
_exptl_crystal_size_mid                0.440
_exptl_crystal_size_min                0.420
_exptl_crystal_size_rad                ?
_exptl_crystal_density_diffrn          1.831
_exptl_crystal_density_meas            ?
_exptl_crystal_density_method         'not measured'
_exptl_absorpt_coefficient_mu          2.606
_exptl_absorpt_correction_type         multi-scan
_exptl_absorpt_process_details        '(Higashi, 1995)'
_exptl_absorpt_correction_T_min        0.255
_exptl_absorpt_correction_T_max        0.335
#------------------------------------------------------------------------------
# EXPERIMENTAL DATA 
_diffrn_radiation_type                'Mo K\a'
_diffrn_radiation_wavelength           0.7107
_diffrn_measurement_device_type       'Rigaku RAXIS-RAPID Imaging Plate'
_diffrn_measurement_method             \w
_diffrn_detector_area_resol_mean       8.00
_diffrn_reflns_number                  18013
_diffrn_reflns_av_R_equivalents        0.015
_diffrn_reflns_theta_max               27.48
_diffrn_measured_fraction_theta_max    0.9978
_diffrn_reflns_theta_full              27.48
_diffrn_measured_fraction_theta_full   0.9978
_diffrn_reflns_limit_h_min             -18
_diffrn_reflns_limit_h_max             18
_diffrn_reflns_limit_k_min             -21
_diffrn_reflns_limit_k_max             22
_diffrn_reflns_limit_l_min             -21
_diffrn_reflns_limit_l_max             21
#------------------------------------------------------------------------------
# REFINEMENT DATA 
_refine_special_details
;
Refinement using reflections with F^2^ > -10.0 sigma(F^2^). The weighted 
R-factor (wR) and goodness of fit (S) are based on F^2^. R-factor (gt) are 
based on F. The threshold expression of F^2^ > 2.0 sigma(F^2^) is used only 
for calculating R-factor (gt).
;
_reflns_number_total                   4492
_reflns_number_gt                      4199
_reflns_threshold_expression           F^2^>2.0\s(F^2^)
_refine_ls_structure_factor_coef       Fsqd
_refine_ls_R_factor_gt                 0.0314
_refine_ls_wR_factor_ref               0.1086
_refine_ls_hydrogen_treatment          noref
_refine_ls_number_reflns               4491
_refine_ls_number_parameters           277
_refine_ls_goodness_of_fit_ref         1.002
_refine_ls_weighting_scheme            calc
_refine_ls_weighting_details
   'w = 1/[\s^2^(Fo^2^) + (0.09700(Max(Fo^2^,0) + 2Fc^2^)/3)^2^]'
_refine_ls_shift/su_max                0.0226
_refine_diff_density_max               1.04
_refine_diff_density_min               -0.77
_refine_ls_extinction_method           none
_refine_ls_extinction_coef             ?
_refine_ls_abs_structure_details       ?
_refine_ls_abs_structure_Flack         0.00000
loop_
_atom_type_symbol
_atom_type_description
_atom_type_scat_dispersion_real
_atom_type_scat_dispersion_imag
_atom_type_scat_source
  'C' 'C'  0.003 0.002 
;International Tables for Crystallography
(1992, Vol. C, Tables 4.2.6.8 and 6.1.1.1)
;
  'H' 'H'  0.000 0.000 
;International Tables for Crystallography
(1992, Vol. C, Table 6.1.1.2)
;
  'N' 'N'  0.006 0.003 
;International Tables for Crystallography
(1992, Vol. C, Tables 4.2.6.8 and 6.1.1.1)
;
  'O' 'O'  0.011 0.006 
;International Tables for Crystallography
(1992, Vol. C, Tables 4.2.6.8 and 6.1.1.1)
;
  'Co' 'Co'  0.349 0.972 
;International Tables for Crystallography
(1992, Vol. C, Tables 4.2.6.8 and 6.1.1.1)
;
  'Gd' 'Gd'  -0.165 3.904 
;International Tables for Crystallography
(1992, Vol. C, Tables 4.2.6.8 and 6.1.1.1)
;
#------------------------------------------------------------------------------
# ATOMIC COORDINATES AND DISPLACEMENT PARAMETERS 
loop_
_atom_site_label
_atom_site_type_symbol
_atom_site_fract_x
_atom_site_fract_y
_atom_site_fract_z
_atom_site_U_iso_or_equiv
_atom_site_adp_type
_atom_site_occupancy
_atom_site_calc_flag
_atom_site_refinement_flags
_atom_site_disorder_assembly
_atom_site_disorder_group
 Gd     Gd 0.0000      0.127793(9) 0.2500      0.02136(5)  Uani 1.00 d S . .
 Co     Co -0.24860(3) 0.11568(3)  0.29275(3)  0.0307(1)   Uani 1.00 d . . .
 O(1)   O  -0.3727(2)  0.1549(2)   0.2312(1)   0.0457(8)   Uani 1.00 d . . .
 O(2)   O  -0.1741(2)  0.1436(1)   0.1998(1)   0.0274(5)   Uani 1.00 d . . .
 O(3)   O  0.1114(1)   0.0884(1)   0.1513(1)   0.0267(5)   Uani 1.00 d . . .
 O(4)   O  0.3079(2)   0.0706(2)   0.1148(1)   0.0390(6)   Uani 1.00 d . . .
 O(5)   O  -0.0418(2)  0.2413(1)   0.3242(1)   0.0337(5)   Uani 1.00 d . . .
 O(6)   O  0.0973(2)   0.2952(2)   0.3627(2)   0.0485(7)   Uani 1.00 d . . .
 O(7)   O  -0.0285(3)  0.3386(2)   0.4057(2)   0.070(1)    Uani 1.00 d . . .
 O(8)   O  -0.0663(2)  -0.0057(1)  0.2069(1)   0.0340(5)   Uani 1.00 d . . .
 O(9)   O  0.0000      -0.1150(2)  0.2500      0.051(1)    Uani 1.00 d S . .
 O(10)  O  -0.2240(2)  0.2247(2)   0.3534(2)   0.0464(7)   Uani 1.00 d . . .
 O(11)  O  -0.2721(2)  0.0048(2)   0.2332(2)   0.0558(8)   Uani 1.00 d . . .
 N(1)   N  -0.0662(2)  0.1185(1)   0.0879(1)   0.0236(6)   Uani 1.00 d . . .
 N(2)   N  0.0107(2)   0.2930(2)   0.3655(2)   0.0327(6)   Uani 1.00 d . . .
 N(3)   N  0.0000      -0.0447(2)  0.2500      0.0326(8)   Uani 1.00 d S . .
 C(1)   C  -0.4901(2)  0.1874(3)   0.1184(3)   0.054(1)    Uani 1.00 d . . .
 C(2)   C  -0.3885(2)  0.1680(2)   0.1551(2)   0.0380(8)   Uani 1.00 d . . .
 C(3)   C  -0.3174(2)  0.1631(2)   0.1016(2)   0.0315(7)   Uani 1.00 d . . .
 C(4)   C  -0.2196(2)  0.1501(2)   0.1242(2)   0.0263(6)   Uani 1.00 d . . .
 C(5)   C  -0.1577(2)  0.1391(2)   0.0590(2)   0.0260(6)   Uani 1.00 d . . .
 C(6)   C  -0.1918(2)  0.1470(2)   -0.0254(2)  0.0358(8)   Uani 1.00 d . . .
 C(7)   C  -0.1299(3)  0.1328(2)   -0.0809(2)  0.0409(9)   Uani 1.00 d . . .
 C(8)   C  -0.0360(2)  0.1107(2)   -0.0523(2)  0.0353(7)   Uani 1.00 d . . .
 C(9)   C  -0.0067(2)  0.1041(2)   0.0329(2)   0.0256(6)   Uani 1.00 d . . .
 C(10)  C  0.0945(2)   0.0848(2)   0.0708(2)   0.0250(6)   Uani 1.00 d . . .
 C(11)  C  0.1618(2)   0.0660(2)   0.0206(2)   0.0310(7)   Uani 1.00 d . . .
 C(12)  C  0.2628(2)   0.0562(2)   0.0446(2)   0.0305(6)   Uani 1.00 d . . .
 C(13)  C  0.3225(3)   0.0291(2)   -0.0181(2)  0.0433(9)   Uani 1.00 d . . .
 C(14)  C  -0.2834(7)  0.2884(5)   0.339(1)    0.095(3)    Uani 0.50 d P . .
 C(14') C  -0.262(1)   0.2662(8)   0.412(1)    0.120(5)    Uani 0.50 d P . .
 C(15)  C  -0.3477(5)  -0.0464(4)  0.2420(3)   0.097(2)    Uani 1.00 d . . .
 H(1)   H  -0.5097     0.2320      0.1433      0.0637      Uiso 1.00 calc . . .
 H(2)   H  -0.5314     0.1452      0.1275      0.0637      Uiso 1.00 calc . . .
 H(3)   H  -0.4942     0.1947      0.0600      0.0637      Uiso 1.00 calc . . .
 H(4)   H  -0.3400     0.1693      0.0439      0.0374      Uiso 1.00 calc . . .
 H(5)   H  -0.2572     0.1612      -0.0444     0.0427      Uiso 1.00 calc . . .
 H(6)   H  -0.1523     0.1377      -0.1387     0.0484      Uiso 1.00 calc . . .
 H(7)   H  0.0073      0.0998      -0.0899     0.0426      Uiso 1.00 calc . . .
 H(8)   H  0.1375      0.0580      -0.0367     0.0367      Uiso 1.00 calc . . .
 H(9)   H  0.2814      0.0194      -0.0694     0.0510      Uiso 1.00 calc . . .
 H(10)  H  0.3687      0.0668      -0.0254     0.0510      Uiso 1.00 calc . . .
 H(11)  H  0.3545      -0.0177     0.0010      0.0510      Uiso 1.00 calc . . .
 H(12)  H  -0.1666     0.2452      0.3559      0.0410      Uiso 1.00 calc . . .
 H(13)  H  -0.3446     0.2805      0.3538      0.1156      Uiso 0.50 calc P . .
 H(13') H  -0.2437     0.3221      0.4044      0.1411      Uiso 0.50 calc P . .
 H(14)  H  -0.2540     0.3332      0.3663      0.1156      Uiso 0.50 calc P . .
 H(14') H  -0.3339     0.2689      0.3931      0.1411      Uiso 0.50 calc P . .
 H(15)  H  -0.2938     0.3008      0.2788      0.1156      Uiso 0.50 calc P . .
 H(16)  H  -0.2237     -0.0306     0.2205      0.0410      Uiso 1.00 calc . . .
 H(17)  H  -0.3670     -0.0731     0.1915      0.1168      Uiso 1.00 calc . . .
 H(18)  H  -0.4018     -0.0169     0.2545      0.1168      Uiso 1.00 calc . . .
 H(19)  H  -0.3275     -0.0809     0.2856      0.1168      Uiso 1.00 calc . . .
 H(115') H  -0.2472     0.2519      0.4627      0.1411      Uiso 0.50 calc P . .
 O(2*)  O  0.1741(2)   0.1436(1)   0.3002(1)   0.0274(5)   Uani 1.00 d . . .
 O(3*)  O  -0.1114(1)  0.0884(1)   0.3487(1)   0.0267(5)   Uani 1.00 d . . .
 O(5*)  O  0.0418(2)   0.2413(1)   0.1758(1)   0.0337(5)   Uani 1.00 d . . .
 O(8*)  O  0.0663(2)   -0.0057(1)  0.2931(1)   0.0340(5)   Uani 1.00 d . . .
 N(1*)  N  0.0662(2)   0.1185(1)   0.4121(1)   0.0236(6)   Uani 1.00 d . . .
 O(4*)  O  -0.3079(2)  0.0706(2)   0.3852(1)   0.0390(6)   Uani 1.00 d . . .
 Co(*)  Co 0.24860(3)  0.11568(3)  0.20725(3)  0.0307(1)   Uani 1.00 d . . .
 C(4*)  C  0.2196(2)   0.1501(2)   0.3758(2)   0.0263(6)   Uani 1.00 d . . .
 C(10*) C  -0.0945(2)  0.0848(2)   0.4292(2)   0.0250(6)   Uani 1.00 d . . .
 N(2*)  N  -0.0107(2)  0.2930(2)   0.1345(2)   0.0327(6)   Uani 1.00 d . . .
 C(5*)  C  0.1577(2)   0.1391(2)   0.4410(2)   0.0260(6)   Uani 1.00 d . . .
 C(9*)  C  0.0067(2)   0.1041(2)   0.4671(2)   0.0256(6)   Uani 1.00 d . . .
 C(12*) C  -0.2628(2)  0.0562(2)   0.4554(2)   0.0305(6)   Uani 1.00 d . . .
 O(1*)  O  0.3727(2)   0.1549(2)   0.2688(1)   0.0457(8)   Uani 1.00 d . . .
 O(10*) O  0.2240(2)   0.2247(2)   0.1466(2)   0.0464(7)   Uani 1.00 d . . .
 O(11*) O  0.2721(2)   0.0048(2)   0.2668(2)   0.0558(8)   Uani 1.00 d . . .
 C(3*)  C  0.3174(2)   0.1631(2)   0.3984(2)   0.0315(7)   Uani 1.00 d . . .
 C(11*) C  -0.1618(2)  0.0660(2)   0.4794(2)   0.0310(7)   Uani 1.00 d . . .
 O(6*)  O  -0.0973(2)  0.2952(2)   0.1373(2)   0.0485(7)   Uani 1.00 d . . .
 O(7*)  O  0.0285(3)   0.3386(2)   0.0943(2)   0.070(1)    Uani 1.00 d . . .
 C(6*)  C  0.1918(2)   0.1470(2)   0.5254(2)   0.0358(8)   Uani 1.00 d . . .
 C(8*)  C  0.0360(2)   0.1107(2)   0.5523(2)   0.0353(7)   Uani 1.00 d . . .
 C(13*) C  -0.3225(3)  0.0291(2)   0.5181(2)   0.0433(9)   Uani 1.00 d . . .
 C(2*)  C  0.3885(2)   0.1680(2)   0.3449(2)   0.0380(8)   Uani 1.00 d . . .
 C(14*) C  0.2834(7)   0.2884(5)   0.161(1)    0.095(3)    Uani 0.50 d P . .
 C(14'*) C  0.262(1)    0.2662(8)   0.088(1)    0.120(5)    Uani 0.50 d P . .
 H(12*) H  0.1666      0.2452      0.1441      0.0410      Uiso 1.00 calc . . .
 C(15*) C  0.3477(5)   -0.0464(4)  0.2580(3)   0.097(2)    Uani 1.00 d . . .
 H(16*) H  0.2237      -0.0306     0.2795      0.0410      Uiso 1.00 calc . . .
 H(4*)  H  0.3400      0.1693      0.4561      0.0374      Uiso 1.00 calc . . .
 H(8*)  H  -0.1375     0.0580      0.5367      0.0367      Uiso 1.00 calc . . .
 C(7*)  C  0.1299(3)   0.1328(2)   0.5809(2)   0.0409(9)   Uani 1.00 d . . .
 H(5*)  H  0.2572      0.1612      0.5444      0.0427      Uiso 1.00 calc . . .
 H(7*)  H  -0.0073     0.0998      0.5899      0.0426      Uiso 1.00 calc . . .
 H(9*)  H  -0.2814     0.0194      0.5694      0.0510      Uiso 1.00 calc . . .
 H(10*) H  -0.3687     0.0668      0.5254      0.0510      Uiso 1.00 calc . . .
 H(11*) H  -0.3545     -0.0177     0.4990      0.0510      Uiso 1.00 calc . . .
 C(1*)  C  0.4901(2)   0.1874(3)   0.3816(3)   0.054(1)    Uani 1.00 d . . .
 H(13*) H  0.3446      0.2805      0.1462      0.1156      Uiso 0.50 calc P . .
 H(13'*) H  0.2437      0.3221      0.0956      0.1411      Uiso 0.50 calc P . .
 H(14*) H  0.2540      0.3332      0.1337      0.1156      Uiso 0.50 calc P . .
 H(14'*) H  0.3339      0.2689      0.1069      0.1411      Uiso 0.50 calc P . .
 H(15*) H  0.2938      0.3008      0.2212      0.1156      Uiso 0.50 calc P . .
 H(115'*) H  0.2472      0.2519      0.0373      0.1411      Uiso 0.50 calc P . .
 H(17*) H  0.3670      -0.0731     0.3085      0.1168      Uiso 1.00 calc . . .
 H(18*) H  0.4018      -0.0169     0.2455      0.1168      Uiso 1.00 calc . . .
 H(19*) H  0.3275      -0.0809     0.2144      0.1168      Uiso 1.00 calc . . .
 H(6*)  H  0.1523      0.1377      0.6387      0.0484      Uiso 1.00 calc . . .
 H(1*)  H  0.5097      0.2320      0.3567      0.0637      Uiso 1.00 calc . . .
 H(2*)  H  0.5314      0.1452      0.3725      0.0637      Uiso 1.00 calc . . .
 H(3*)  H  0.4942      0.1947      0.4400      0.0637      Uiso 1.00 calc . . .

loop_
_atom_site_aniso_label
_atom_site_aniso_U_11
_atom_site_aniso_U_22
_atom_site_aniso_U_33
_atom_site_aniso_U_12
_atom_site_aniso_U_13
_atom_site_aniso_U_23
 Gd     0.0206(1)   0.0244(1)   0.0204(1)   0.0000      0.00741(8)  0.0000     
 Co     0.0242(2)   0.0426(2)   0.0267(2)   -0.0018(2)  0.0084(2)   0.0034(2)  
 O(1)   0.027(1)    0.075(2)    0.037(1)    0.006(1)    0.010(1)    0.008(1)   
 O(2)   0.0260(9)   0.0345(10)  0.0225(9)   0.0013(8)   0.0058(7)   0.0035(8)  
 O(3)   0.0262(9)   0.035(1)    0.0207(8)   0.0013(8)   0.0078(7)   0.0007(8)  
 O(4)   0.031(1)    0.055(1)    0.033(1)    0.007(1)    0.0129(9)   -0.004(1)  
 O(5)   0.030(1)    0.033(1)    0.039(1)    -0.0015(8)  0.0085(9)   -0.0080(8) 
 O(6)   0.033(1)    0.046(1)    0.064(2)    -0.009(1)   0.002(1)    -0.003(1)  
 O(7)   0.068(2)    0.073(2)    0.071(2)    0.017(2)    0.017(2)    -0.043(2)  
 O(8)   0.042(1)    0.031(1)    0.029(1)    -0.0019(9)  0.0038(9)   0.0014(8)  
 O(9)   0.093(3)    0.026(1)    0.034(2)    0.0000      0.012(2)    0.0000     
 O(10)  0.031(1)    0.043(1)    0.068(2)    0.0024(10)  0.016(1)    -0.006(1)  
 O(11)  0.069(2)    0.050(1)    0.050(2)    -0.017(1)   0.015(1)    -0.012(1)  
 N(1)   0.025(1)    0.026(1)    0.021(1)    -0.0017(8)  0.0067(9)   0.0015(8)  
 N(2)   0.037(1)    0.029(1)    0.031(1)    0.0047(9)   0.0017(10)  -0.0026(9) 
 N(3)   0.050(2)    0.028(1)    0.022(2)    0.0000      0.012(2)    0.0000     
 C(1)   0.027(1)    0.077(3)    0.058(2)    0.003(2)    0.010(1)    0.017(2)   
 C(2)   0.029(1)    0.045(2)    0.040(1)    -0.001(1)   0.007(1)    0.008(1)   
 C(3)   0.027(1)    0.037(2)    0.030(1)    0.003(1)    0.002(1)    0.005(1)   
 C(4)   0.026(1)    0.027(1)    0.026(1)    -0.002(1)   0.0058(9)   0.004(1)   
 C(5)   0.025(1)    0.028(1)    0.025(1)    -0.001(1)   0.0051(10)  0.003(1)   
 C(6)   0.036(2)    0.046(2)    0.025(1)    0.003(1)    0.004(1)    0.006(1)   
 C(7)   0.042(2)    0.057(2)    0.022(2)    0.004(1)    0.003(1)    0.005(1)   
 C(8)   0.038(2)    0.047(2)    0.023(1)    0.001(1)    0.010(1)    0.000(1)   
 C(9)   0.027(1)    0.028(1)    0.023(1)    -0.004(1)   0.0076(9)   0.000(1)   
 C(10)  0.027(1)    0.026(1)    0.024(1)    -0.0030(10) 0.0089(10)  -0.0016(10)
 C(11)  0.033(1)    0.036(1)    0.027(1)    -0.002(1)   0.014(1)    -0.004(1)  
 C(12)  0.034(1)    0.029(1)    0.033(1)    -0.005(1)   0.017(1)    -0.005(1)  
 C(13)  0.038(2)    0.052(2)    0.045(2)    -0.005(1)   0.023(1)    -0.014(2)  
 C(14)  0.036(4)    0.037(4)    0.21(1)     0.001(3)    0.020(7)    -0.038(7)  
 C(14') 0.120(10)   0.105(10)   0.170(9)    -0.045(7)   0.125(9)    -0.108(8)  
 C(15)  0.119(5)    0.107(5)    0.073(3)    -0.079(4)   0.038(3)    -0.014(3)  
 O(2*)  0.0260(9)   0.0345(10)  0.0225(9)   -0.0013(8)  0.0058(7)   -0.0035(8) 
 O(3*)  0.0262(9)   0.035(1)    0.0207(8)   -0.0013(8)  0.0078(7)   -0.0007(8) 
 O(5*)  0.030(1)    0.033(1)    0.039(1)    0.0015(8)   0.0085(9)   0.0080(8)  
 O(8*)  0.042(1)    0.031(1)    0.029(1)    0.0019(9)   0.0038(9)   -0.0014(8) 
 N(1*)  0.025(1)    0.026(1)    0.021(1)    0.0017(8)   0.0067(9)   -0.0015(8) 
 O(4*)  0.031(1)    0.055(1)    0.033(1)    -0.007(1)   0.0129(9)   0.004(1)   
 Co(*)  0.0242(2)   0.0426(2)   0.0267(2)   0.0018(2)   0.0084(2)   -0.0034(2) 
 C(4*)  0.026(1)    0.027(1)    0.026(1)    0.002(1)    0.0058(9)   -0.004(1)  
 C(10*) 0.027(1)    0.026(1)    0.024(1)    0.0030(10)  0.0089(10)  0.0016(10) 
 N(2*)  0.037(1)    0.029(1)    0.031(1)    -0.0047(9)  0.0017(10)  0.0026(9)  
 C(5*)  0.025(1)    0.028(1)    0.025(1)    0.001(1)    0.0051(10)  -0.003(1)  
 C(9*)  0.027(1)    0.028(1)    0.023(1)    0.004(1)    0.0076(9)   0.000(1)   
 C(12*) 0.034(1)    0.029(1)    0.033(1)    0.005(1)    0.017(1)    0.005(1)   
 O(1*)  0.027(1)    0.075(2)    0.037(1)    -0.006(1)   0.010(1)    -0.008(1)  
 O(10*) 0.031(1)    0.043(1)    0.068(2)    -0.0024(10) 0.016(1)    0.006(1)   
 O(11*) 0.069(2)    0.050(1)    0.050(2)    0.017(1)    0.015(1)    0.012(1)   
 C(3*)  0.027(1)    0.037(2)    0.030(1)    -0.003(1)   0.002(1)    -0.005(1)  
 C(11*) 0.033(1)    0.036(1)    0.027(1)    0.002(1)    0.014(1)    0.004(1)   
 O(6*)  0.033(1)    0.046(1)    0.064(2)    0.009(1)    0.002(1)    0.003(1)   
 O(7*)  0.068(2)    0.073(2)    0.071(2)    -0.017(2)   0.017(2)    0.043(2)   
 C(6*)  0.036(2)    0.046(2)    0.025(1)    -0.003(1)   0.004(1)    -0.006(1)  
 C(8*)  0.038(2)    0.047(2)    0.023(1)    -0.001(1)   0.010(1)    0.000(1)   
 C(13*) 0.038(2)    0.052(2)    0.045(2)    0.005(1)    0.023(1)    0.014(2)   
 C(2*)  0.029(1)    0.045(2)    0.040(1)    0.001(1)    0.007(1)    -0.008(1)  
 C(14*) 0.036(4)    0.037(4)    0.21(1)     -0.001(3)   0.020(7)    0.038(7)   
 C(14'*) 0.120(10)   0.105(10)   0.170(9)    0.045(7)    0.125(9)    0.108(8)   
 C(15*) 0.119(5)    0.107(5)    0.073(3)    0.079(4)    0.038(3)    0.014(3)   
 C(7*)  0.042(2)    0.057(2)    0.022(2)    -0.004(1)   0.003(1)    -0.005(1)  
 C(1*)  0.027(1)    0.077(3)    0.058(2)    -0.003(2)   0.010(1)    -0.017(2)  
#------------------------------------------------------------------------------
_computing_data_collection            'PROCESS-AUTO'
_computing_cell_refinement            'PROCESS-AUTO'
_computing_data_reduction             'teXsan Ver. 1.11'
_computing_structure_solution          SIR92
_computing_structure_refinement       'teXsan Ver. 1.10'
_computing_publication_material       'teXsan Ver. 1.11'
_computing_molecular_graphics          ?
#------------------------------------------------------------------------------
_geom_special_details
;
 ?
;
loop_
_geom_bond_atom_site_label_1
_geom_bond_atom_site_label_2
_geom_bond_distance
_geom_bond_site_symmetry_1
_geom_bond_site_symmetry_2
_geom_bond_publ_flag
 Gd        O(2)      2.460(2)   . . yes
 Gd        O(2)      2.460(2)   . 2_555 yes
 Gd        O(3)      2.511(2)   . . yes
 Gd        O(3)      2.511(2)   . 2_555 yes
 Gd        O(5)      2.434(2)   . . yes
 Gd        O(5)      2.434(2)   . 2_555 yes
 Gd        O(8)      2.553(2)   . . yes
 Gd        O(8)      2.553(2)   . 2_555 yes
 Gd        N(1)      2.662(2)   . . yes
 Gd        N(1)      2.662(2)   . 2_555 yes
 Co        O(1)      1.983(2)   . . yes
 Co        O(2)      2.034(2)   . . yes
 Co        O(3)      2.047(2)   . 2_555 yes
 Co        O(4)      1.995(2)   . 2_555 yes
 Co        O(10)     2.138(3)   . . yes
 Co        O(11)     2.158(3)   . . yes
 O(1)      C(2)      1.247(4)   . . yes
 O(2)      C(4)      1.298(4)   . . yes
 O(3)      C(10)     1.298(3)   . . yes
 O(4)      C(12)     1.240(4)   . . yes
 O(5)      N(2)      1.281(3)   . . yes
 O(6)      N(2)      1.221(4)   . . yes
 O(7)      N(2)      1.214(4)   . . yes
 O(8)      N(3)      1.267(3)   . . yes
 O(9)      N(3)      1.221(5)   . . yes
 O(10)     C(14)     1.382(10)  . . yes
 O(10)     C(14')    1.375(7)   . . yes
 O(11)     C(15)     1.408(5)   . . yes
 N(1)      C(5)      1.340(4)   . . yes
 N(1)      C(9)      1.344(4)   . . yes
 C(1)      C(2)      1.492(5)   . . yes
 C(2)      C(3)      1.427(4)   . . yes
 C(3)      C(4)      1.380(4)   . . yes
 C(4)      C(5)      1.489(4)   . . yes
 C(5)      C(6)      1.390(4)   . . yes
 C(6)      C(7)      1.374(5)   . . yes
 C(7)      C(8)      1.377(5)   . . yes
 C(8)      C(9)      1.389(4)   . . yes
 C(9)      C(10)     1.491(4)   . . yes
 C(10)     C(11)     1.384(4)   . . yes
 C(11)     C(12)     1.416(4)   . . yes
 C(12)     C(13)     1.500(4)   . . yes
 C(14)     C(14')    1.24(2)    . . yes
#------------------------------------------------------------------------------
loop_
_geom_angle_atom_site_label_1
_geom_angle_atom_site_label_2
_geom_angle_atom_site_label_3
_geom_angle
_geom_angle_site_symmetry_1
_geom_angle_site_symmetry_2
_geom_angle_site_symmetry_3
_geom_angle_publ_flag
   O(2)      Gd        O(2)      167.2(1)   . . 2_555 yes
   O(2)      Gd        O(3)      120.14(7)  . . . yes
   O(2)      Gd        O(3)      63.81(7)   . . 2_555 yes
   O(2)      Gd        O(5)      76.73(7)   . . . yes
   O(2)      Gd        O(5)      92.81(7)   . . 2_555 yes
   O(2)      Gd        O(8)      73.29(7)   . . . yes
   O(2)      Gd        O(8)      119.34(7)  . . 2_555 yes
   O(2)      Gd        N(1)      60.50(7)   . . . yes
   O(2)      Gd        N(1)      120.39(7)  . . 2_555 yes
   O(2)      Gd        O(3)      63.81(7)   2_555 . . yes
   O(2)      Gd        O(3)      120.14(7)  2_555 . 2_555 yes
   O(2)      Gd        O(5)      92.81(7)   2_555 . . yes
   O(2)      Gd        O(5)      76.73(7)   2_555 . 2_555 yes
   O(2)      Gd        O(8)      119.34(7)  2_555 . . yes
   O(2)      Gd        O(8)      73.29(7)   2_555 . 2_555 yes
   O(2)      Gd        N(1)      120.39(7)  2_555 . . yes
   O(2)      Gd        N(1)      60.50(7)   2_555 . 2_555 yes
   O(3)      Gd        O(3)      148.4(1)   . . 2_555 yes
   O(3)      Gd        O(5)      139.81(7)  . . . yes
   O(3)      Gd        O(5)      71.21(7)   . . 2_555 yes
   O(3)      Gd        O(8)      79.17(7)   . . . yes
   O(3)      Gd        O(8)      72.11(7)   . . 2_555 yes
   O(3)      Gd        N(1)      60.01(7)   . . . yes
   O(3)      Gd        N(1)      117.84(7)  . . 2_555 yes
   O(3)      Gd        O(5)      71.21(7)   2_555 . . yes
   O(3)      Gd        O(5)      139.81(7)  2_555 . 2_555 yes
   O(3)      Gd        O(8)      72.11(7)   2_555 . . yes
   O(3)      Gd        O(8)      79.17(7)   2_555 . 2_555 yes
   O(3)      Gd        N(1)      117.84(7)  2_555 . . yes
   O(3)      Gd        N(1)      60.01(7)   2_555 . 2_555 yes
   O(5)      Gd        O(5)      71.8(1)    . . 2_555 yes
   O(5)      Gd        O(8)      140.03(7)  . . . yes
   O(5)      Gd        O(8)      134.78(7)  . . 2_555 yes
   O(5)      Gd        N(1)      118.01(7)  . . . yes
   O(5)      Gd        N(1)      68.17(7)   . . 2_555 yes
   O(5)      Gd        O(8)      134.78(7)  2_555 . . yes
   O(5)      Gd        O(8)      140.03(7)  2_555 . 2_555 yes
   O(5)      Gd        N(1)      68.17(7)   2_555 . . yes
   O(5)      Gd        N(1)      118.01(7)  2_555 . 2_555 yes
   O(8)      Gd        O(8)      49.57(10)  . . 2_555 yes
   O(8)      Gd        N(1)      67.59(7)   . . . yes
   O(8)      Gd        N(1)      105.77(7)  . . 2_555 yes
   O(8)      Gd        N(1)      105.77(7)  2_555 . . yes
   O(8)      Gd        N(1)      67.59(7)   2_555 . 2_555 yes
   N(1)      Gd        N(1)      173.1(1)   . . 2_555 yes
   O(1)      Co        O(2)      93.12(9)   . . . yes
   O(1)      Co        O(3)      171.6(1)   . . 2_555 yes
   O(1)      Co        O(4)      94.57(10)  . . 2_555 yes
   O(1)      Co        O(10)     89.6(1)    . . . yes
   O(1)      Co        O(11)     91.2(1)    . . . yes
   O(2)      Co        O(3)      80.16(9)   . . 2_555 yes
   O(2)      Co        O(4)      169.6(1)   . . 2_555 yes
   O(2)      Co        O(10)     94.04(10)  . . . yes
   O(2)      Co        O(11)     86.3(1)    . . . yes
   O(3)      Co        O(4)      92.74(9)   2_555 . 2_555 yes
   O(3)      Co        O(10)     85.93(9)   2_555 . . yes
   O(3)      Co        O(11)     93.3(1)    2_555 . . yes
   O(4)      Co        O(10)     93.0(1)    2_555 . . yes
   O(4)      Co        O(11)     86.5(1)    2_555 . . yes
   O(10)     Co        O(11)     179.1(1)   . . . yes
   Co        O(1)      C(2)      124.6(2)   . . . yes
   Gd        O(2)      Co        109.02(9)  . . . yes
   Gd        O(2)      C(4)      129.4(2)   . . . yes
   Co        O(2)      C(4)      119.7(2)   . . . yes
   Gd        O(3)      Co        106.71(8)  . . 2_555 yes
   Gd        O(3)      C(10)     129.1(2)   . . . yes
   Co        O(3)      C(10)     117.8(2)   2_555 . . yes
   Co        O(4)      C(12)     124.3(2)   2_555 . . yes
   Gd        O(5)      N(2)      131.7(2)   . . . yes
   Gd        O(8)      N(3)      97.6(2)    . . . yes
   Co        O(10)     C(14)     125.6(5)   . . . yes
   Co        O(10)     C(14')    137.3(5)   . . . yes
   C(14)     O(10)     C(14')    53.6(9)    . . . yes
   Co        O(11)     C(15)     125.4(4)   . . . yes
   Gd        N(1)      C(5)      119.6(2)   . . . yes
   Gd        N(1)      C(9)      121.3(2)   . . . yes
   C(5)      N(1)      C(9)      118.5(2)   . . . yes
   O(5)      N(2)      O(6)      119.5(3)   . . . yes
   O(5)      N(2)      O(7)      117.9(3)   . . . yes
   O(6)      N(2)      O(7)      122.6(3)   . . . yes
   O(8)      N(3)      O(8)      115.3(3)   . . 2_555 yes
   O(8)      N(3)      O(9)      122.3(2)   . . . yes
   O(8)      N(3)      O(9)      122.3(2)   2_555 . . yes
   O(1)      C(2)      C(1)      116.4(3)   . . . yes
   O(1)      C(2)      C(3)      124.6(3)   . . . yes
   C(1)      C(2)      C(3)      118.9(3)   . . . yes
   C(2)      C(3)      C(4)      127.4(3)   . . . yes
   O(2)      C(4)      C(3)      125.7(3)   . . . yes
   O(2)      C(4)      C(5)      114.4(2)   . . . yes
   C(3)      C(4)      C(5)      119.9(3)   . . . yes
   N(1)      C(5)      C(4)      114.6(3)   . . . yes
   N(1)      C(5)      C(6)      122.1(3)   . . . yes
   C(4)      C(5)      C(6)      123.3(3)   . . . yes
   C(5)      C(6)      C(7)      118.9(3)   . . . yes
   C(6)      C(7)      C(8)      119.7(3)   . . . yes
   C(7)      C(8)      C(9)      118.4(3)   . . . yes
   N(1)      C(9)      C(8)      122.5(3)   . . . yes
   N(1)      C(9)      C(10)     114.6(2)   . . . yes
   C(8)      C(9)      C(10)     122.8(3)   . . . yes
   O(3)      C(10)     C(9)      114.5(2)   . . . yes
   O(3)      C(10)     C(11)     125.5(3)   . . . yes
   C(9)      C(10)     C(11)     120.0(2)   . . . yes
   C(10)     C(11)     C(12)     127.5(3)   . . . yes
   O(4)      C(12)     C(11)     124.7(3)   . . . yes
   O(4)      C(12)     C(13)     115.8(3)   . . . yes
   C(11)     C(12)     C(13)     119.4(3)   . . . yes
   O(10)     C(14)     C(14')    62.9(8)    . . . yes
   O(10)     C(14')    C(14)     63.5(6)    . . . yes
#------------------------------------------------------------------------------
loop_
_geom_contact_atom_site_label_1
_geom_contact_atom_site_label_2
_geom_contact_distance
_geom_contact_site_symmetry_1
_geom_contact_site_symmetry_2
_geom_contact_publ_flag
 Gd        O(3)      2.511(2)   . . ?
 Gd        O(3)      2.511(2)   . 2_555 ?
 Gd        O(8)      2.553(2)   . . ?
 Gd        O(8)      2.553(2)   . 2_555 ?
 Gd        N(1)      2.662(2)   . . ?
 Gd        N(1)      2.662(2)   . 2_555 ?
 O(1)      C(1)      3.400(4)   . 2_455 ?
 O(4)      C(1)      3.475(5)   . 1_655 ?
 O(6)      C(6)      3.367(4)   . 8_555 ?
 O(6)      C(15)     3.540(6)   . 5_555 ?
 O(7)      C(15)     3.385(7)   . 6_455 ?
 O(7)      C(1)      3.454(6)   . 8_555 ?
 O(7)      C(13)     3.467(5)   . 8_455 ?
 O(8)      C(8)      3.592(4)   . 3_555 ?
 O(9)      C(8)      3.345(3)   . 3_555 ?
 O(9)      C(8)      3.345(3)   . 4_555 ?
 O(9)      C(7)      3.554(4)   . 3_555 ?
 O(9)      C(7)      3.554(4)   . 4_555 ?
 O(9)      C(14)     3.56(1)    . 5_545 ?
 O(9)      C(14)     3.56(1)    . 6_445 ?
 O(11)     C(13)     3.514(4)   . 3_555 ?
 N(3)      C(8)      3.534(3)   . 3_555 ?
 N(3)      C(8)      3.534(3)   . 4_555 ?
 C(3)      C(6)      3.534(5)   . 7_455 ?
 C(8)      C(10)     3.493(5)   . 3_555 ?
 C(14')    C(14')    2.89(4)    . 7_456 ?
#------------------------------------------------------------------------------
#------------------------------------------------------------------------------
